# Supplementary material
Source: PubMed Central journal article supplement (PMC10900840)
Supplement: NIHMS1922359-supplement-bi-2022-00341f_SI_1.pdf [file NIHMS1922359-supplement-bi-2022-00341f_SI_1.pdf]

**Supporting Information for:**

**Structural Insights into Binding of Remdesivir Triphosphate within the Replication-Transcription Complex of SARS-CoV-2**

Jimin Wang<sup>1,\*</sup>, Yuanjun Shi<sup>2</sup>, Krystle Reiss<sup>2</sup>, Federica Maschietto<sup>2</sup>, Elias Lolis<sup>3</sup>, William H. Konigsberg<sup>1</sup>, George P. Lisi<sup>4</sup>, Victor S. Batista<sup>2,\*</sup>

<sup>1</sup>*Department of Molecular Biophysics and Biochemistry, Yale University, New Haven, CT 06520-8114.*

<sup>2</sup>*Department of Chemistry, Yale University, New Haven, CT 06520-8499.* <sup>3</sup>*Department of Pharmacology, Yale University, New Haven, CT 06520-8066.* <sup>4</sup>*Department of Molecular and Cell Biology and Biochemistry, Brown University, Providence, RI 02912.*

Supporting information contains the refined PDB coordinates of the equilibrated ATP-bound complex against MD-derived ESP maps.
